# Supplementary material for: Multi-scale Inference of Interaction Rules in Animal Groups Using Bayesian Model Selection
Source: PubMed Central journal article supplement (PMC3605063; doi:10.1371/journal.pcbi.1002961), 2013-03-21
Supplement: pcbi.1002961.s013.pdf [file pcbi.1002961.s013.pdf]

## Text S1:

### The experimental setup

Figure S1 shows a still image of the experimental setup from a typical experiment with six prawns. Video S1 shows a video of the same experiment.

### Simulation results for all tested models

Figures S2-S12 show the results of simulating each of the models tested in this paper, using the maximum *a posteriori* parameters inferred from the data shown in Table 1. The quantitative quality-of-fit between these and the experimental data is shown in Figure 3.
